# Supplementary material for: Nonlinear optical chromophores containing a novel pyrrole-based bridge: optimization of electro-optic activity and thermal stability by modifying the bridge
Source: Royal Society of Chemistry journal article supplement (doi:10.1039/c4tc00900b), 2014-01-01

## Supporting Information for

### Nonlinear optical chromophores containing novel pyrrole-based bridge: optimization of electro-optic activity and thermal stability by modifying the bridge

Fenggang Liu,<sup>ab</sup> Haoran Wang,<sup>ab</sup> Yuhui Yang,<sup>ab</sup> Huajun Xu,<sup>ab</sup> Maolin Zhang,<sup>ab</sup> Airui Zhang,<sup>ab</sup> Shuhui Bo,<sup>a\*</sup>  
Zhen Zhen,<sup>a</sup> Xinhou Liu,<sup>a</sup> and Ling Qiu<sup>a\*</sup>

<sup>a</sup> Key Laboratory of Photochemical Conversion and Optoelectronic Materials, Technical Institute of Physics and  
Chemistry, Chinese Academy of Sciences, Beijing 100190, PR China

<sup>b</sup> University of Chinese Academy of Sciences, Beijing 100043, PR China

\* Corresponding authors. Tel.: +86-01-82543529; Fax: +86-01-2543529

E-mail address: boshuhui@mail.ipc.ac.cn (S. Bo), qiuling@mail.ipc.ac.cn

1 Cyclic voltammograms of chromophores A-C.

2 The photoluminescence emission spectra of chromophores A, B and C.

3 UV-Vis absorption spectra of E-O polymers before and after poling.

4 <sup>1</sup>H and <sup>13</sup>C NMR spectra

1 Cyclic voltammograms of chromophores A-C

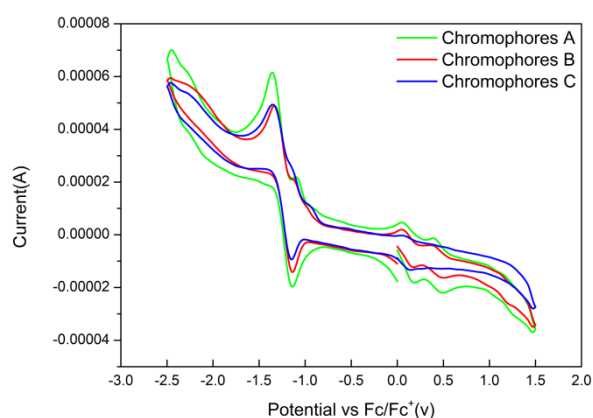

Fig. 7 Cyclic voltammograms of chromophores A-C recorded in CH<sub>3</sub>CN solutions containing 0.1 M Bu<sub>4</sub>NPF<sub>6</sub> supporting electrolyte at a scan rate of 50 mV s<sup>-1</sup>.

## 2 The photoluminescence emission spectra of chromophores A, B and C.

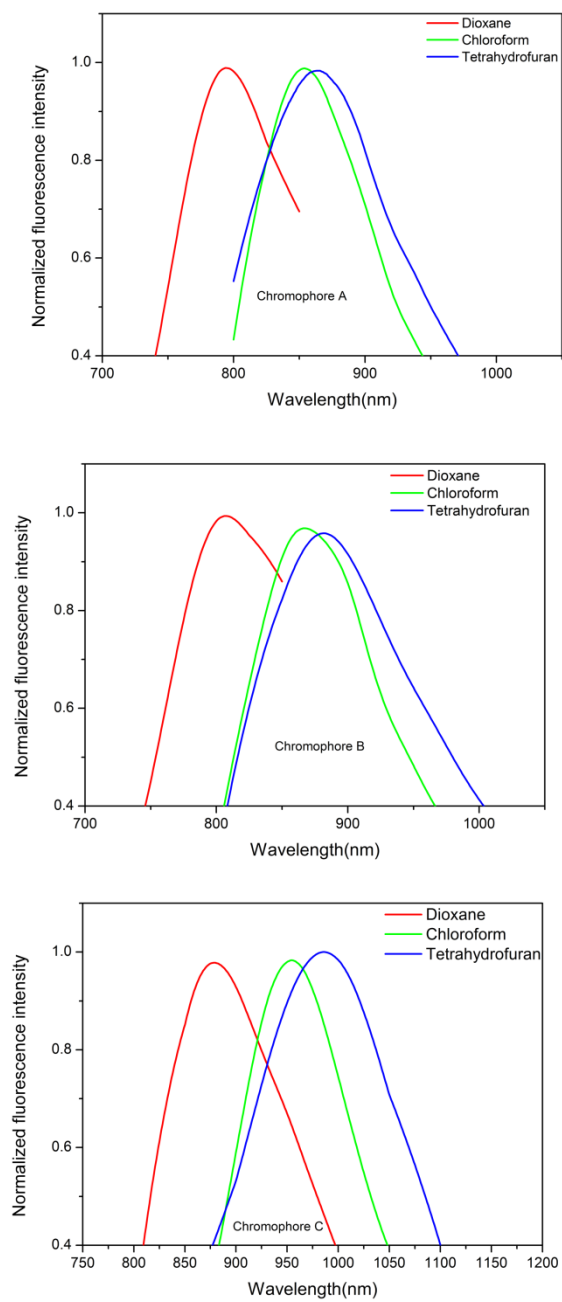

Fig. 8 The photoluminescence emission spectra of chromophores A, B and C in different solvents

### 3 UV-Vis absorption spectra of E-O polymers before and after poling.

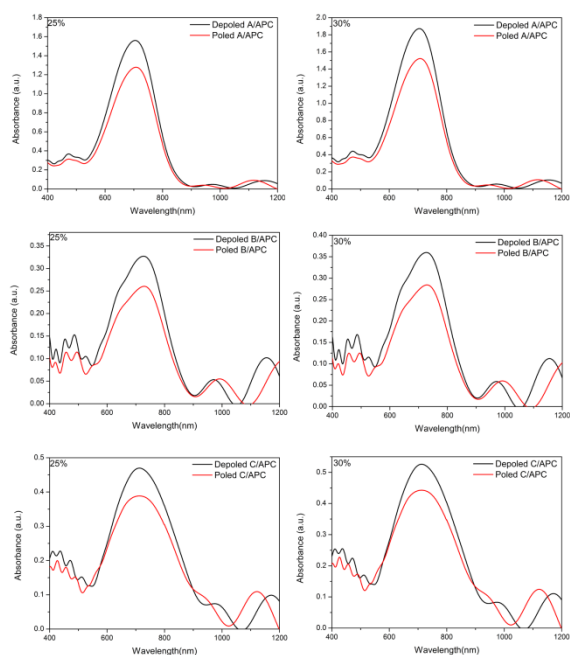

Fig. 9 UV-Vis absorption spectra of E-O polymers before and after poling (25% and 30% wt).

### 4 $^1\text{H}$ and $^{13}\text{C}$ NMR spectra

Compound 4  $^1\text{H}$  NMR spectra

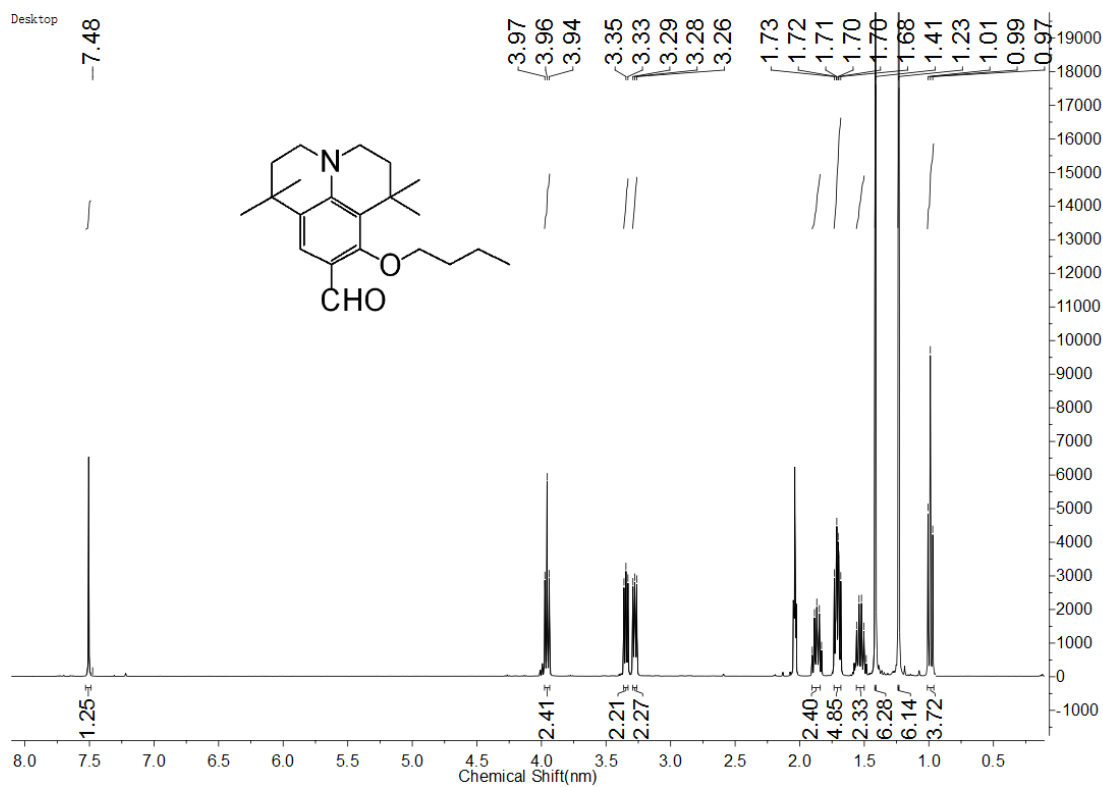

Compound 5a <sup>1</sup>H NMR spectra

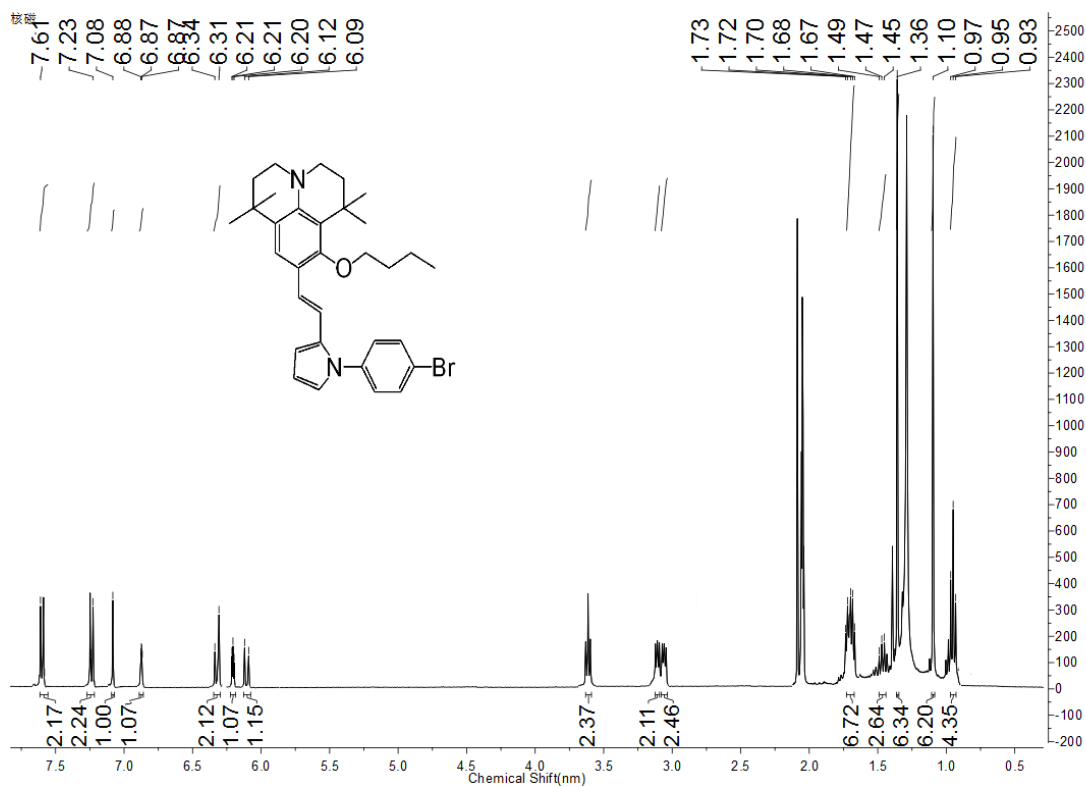

Compound 5b <sup>1</sup>H NMR spectra

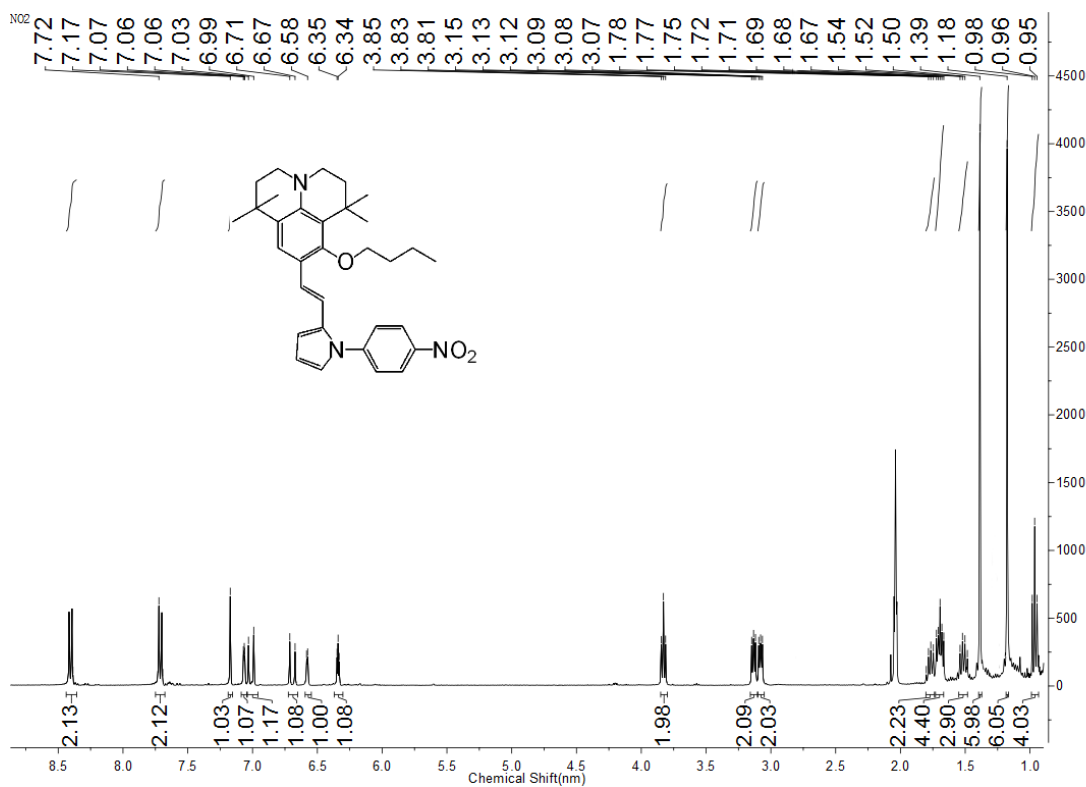



Compound 6a <sup>13</sup>C NMR spectra

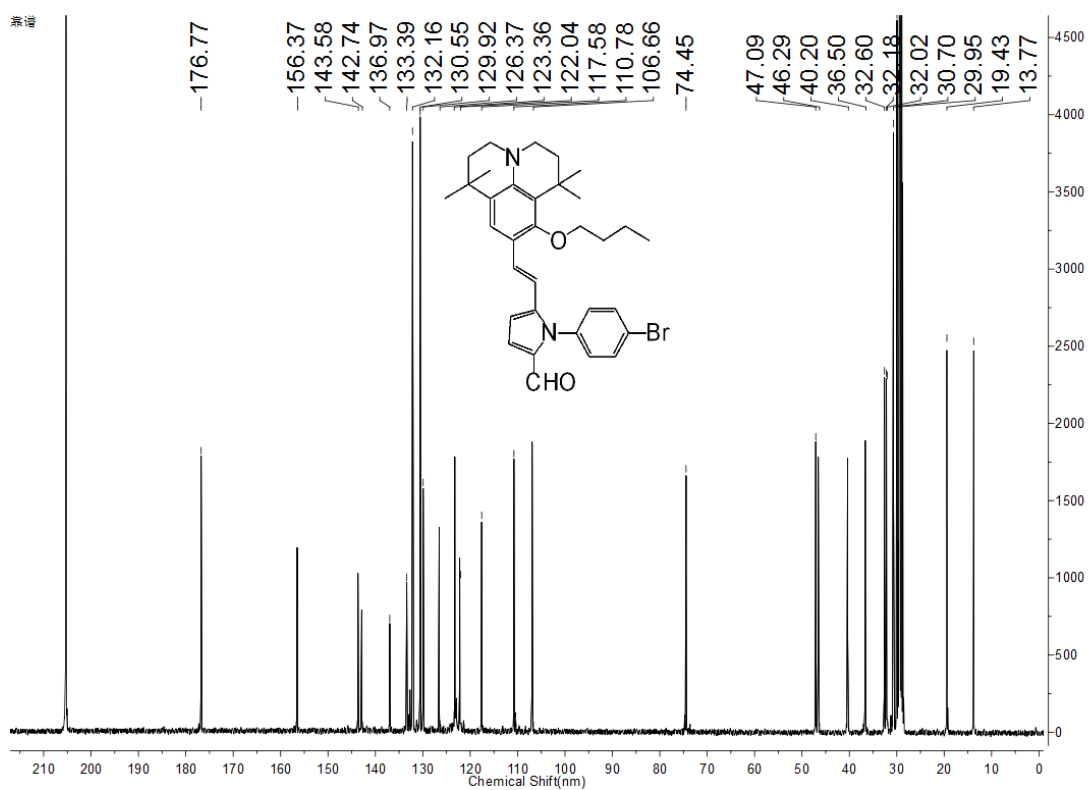

Compound 6b <sup>1</sup>H NMR spectra

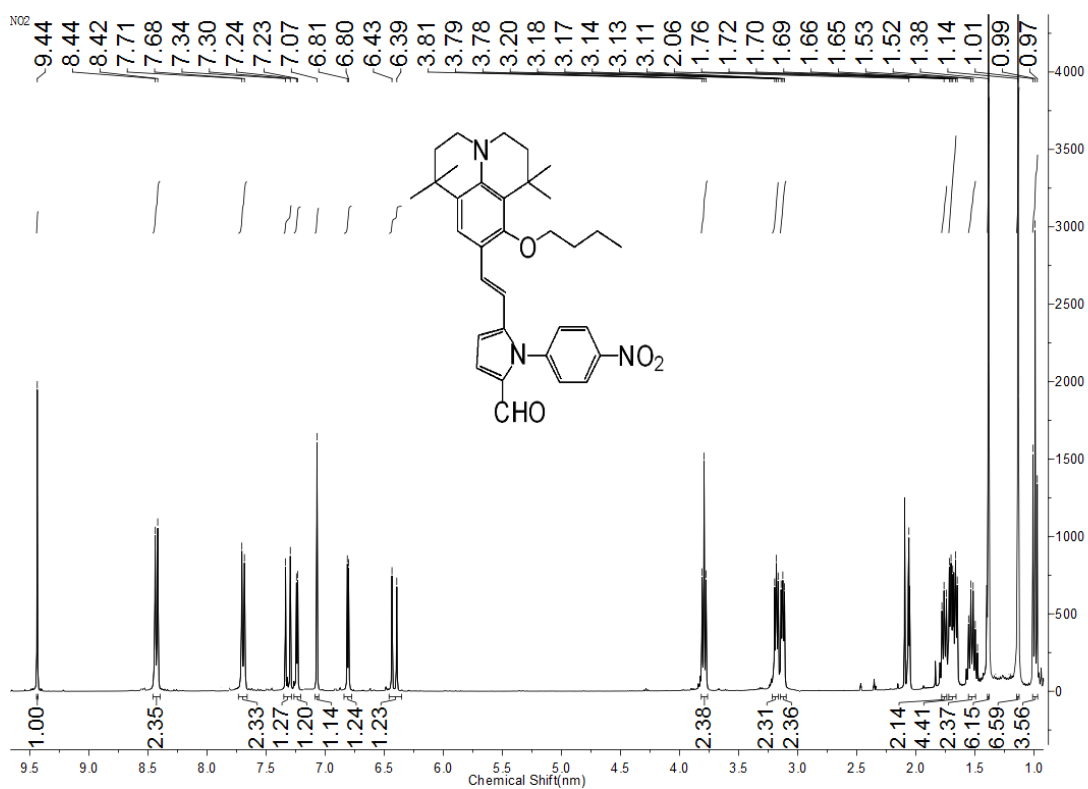

Compound 6b <sup>13</sup>C NMR spectra

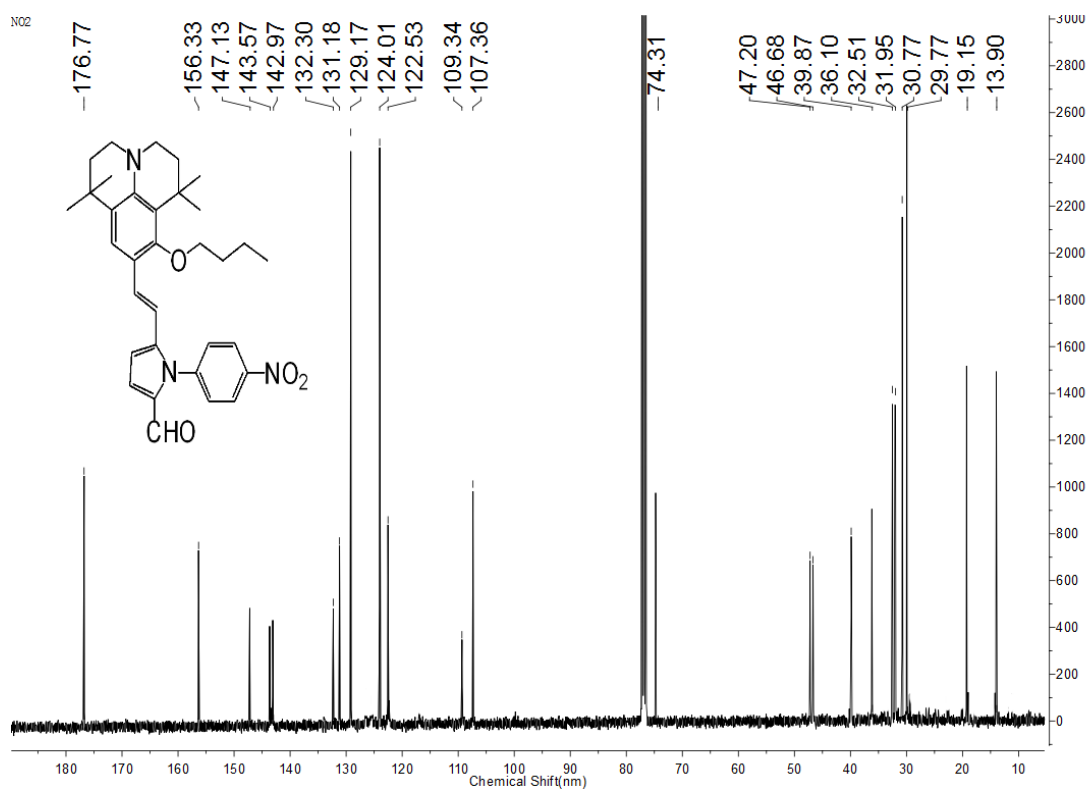

Compound 6c <sup>1</sup>H NMR spectra

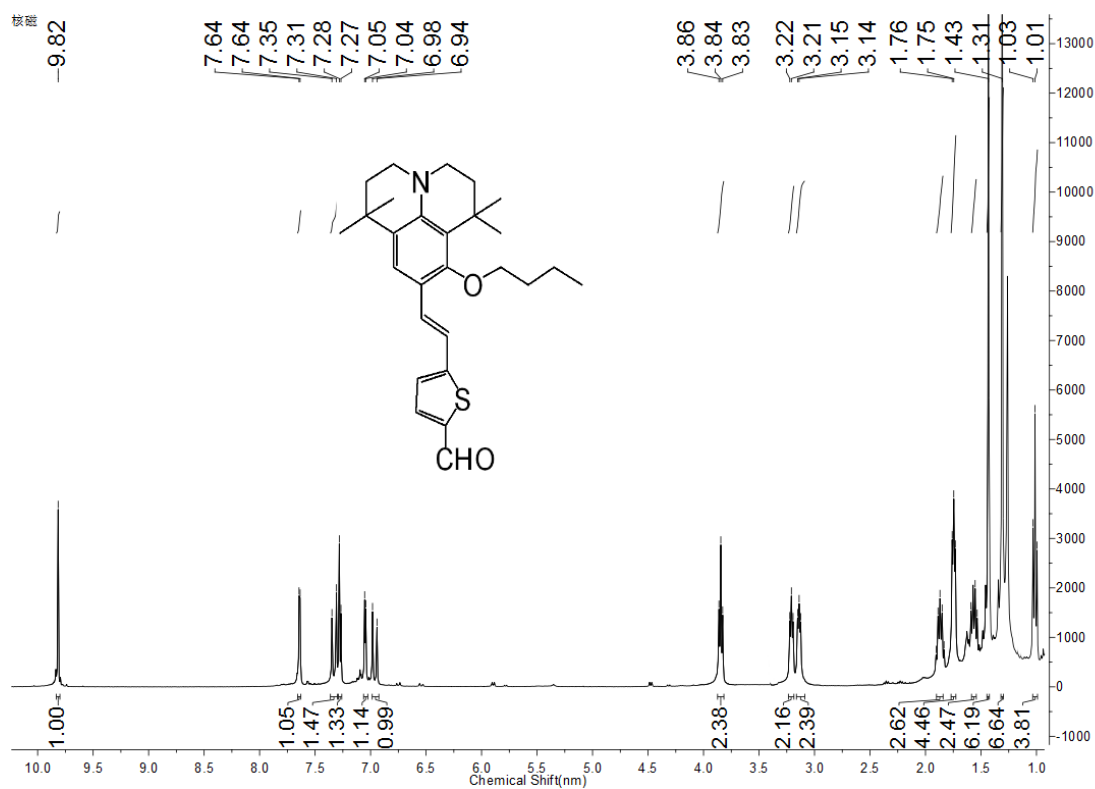

Compound 6c <sup>13</sup>C NMR spectra

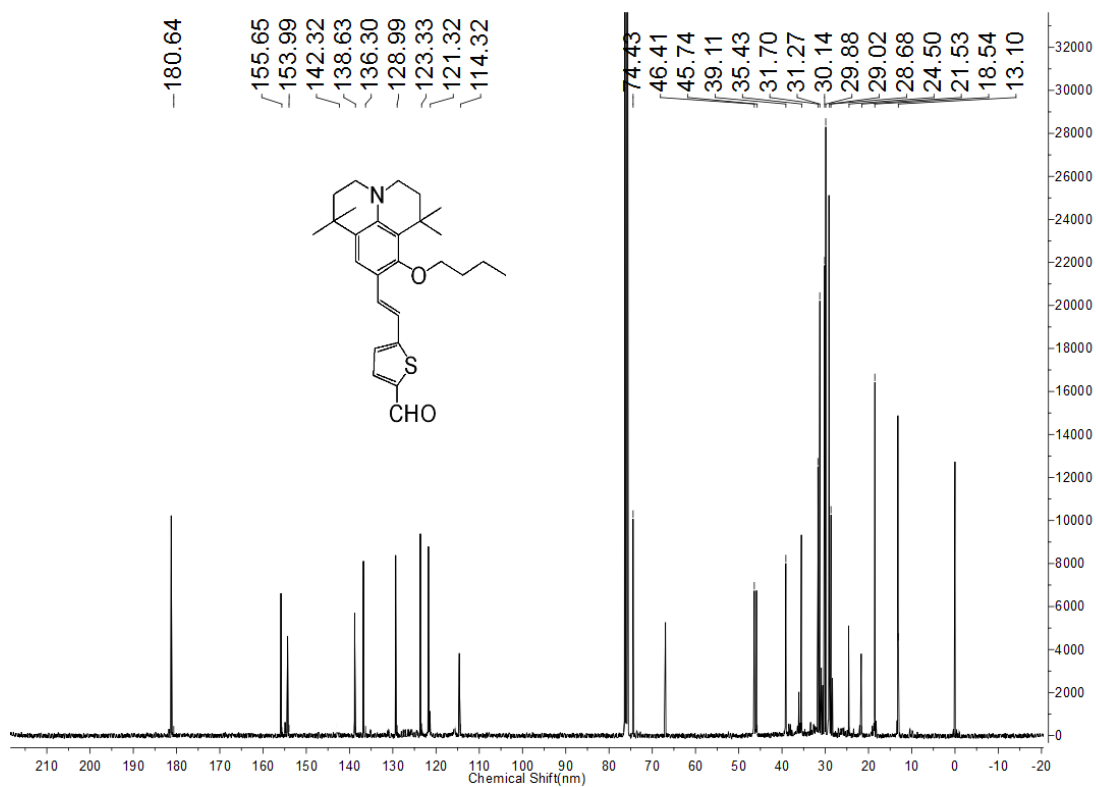

Chromophore A <sup>1</sup>H NMR spectra

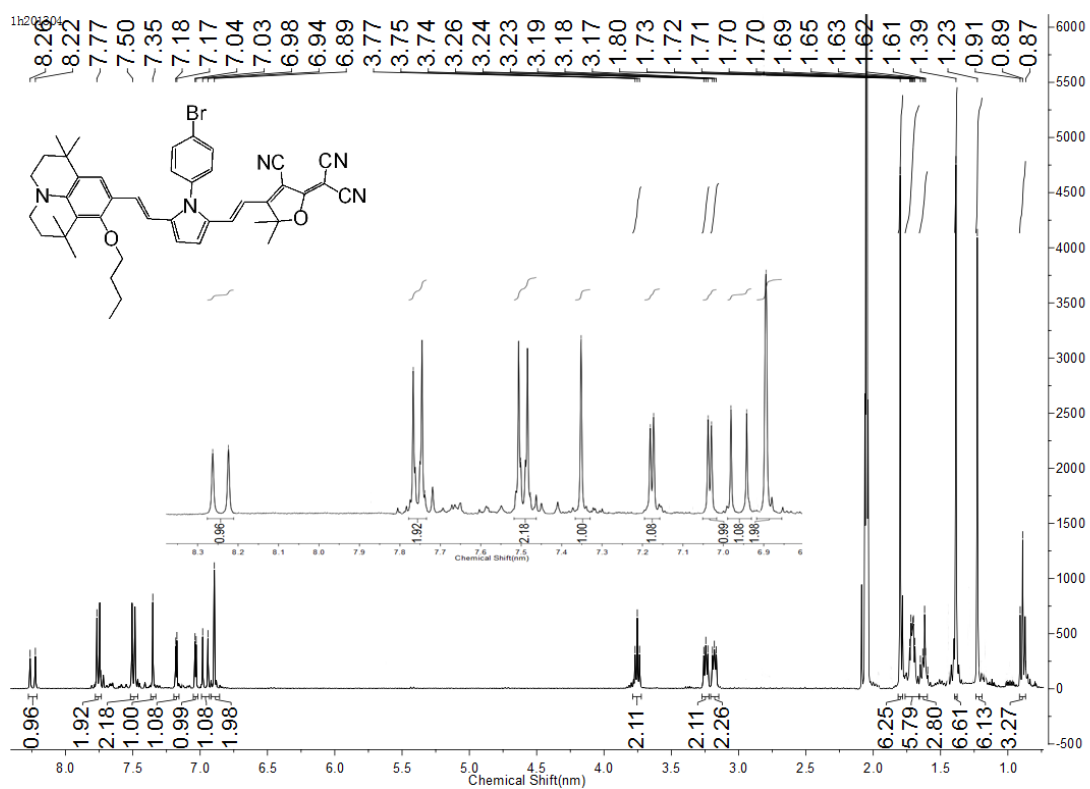



Chromophore A <sup>13</sup>C NMR spectra

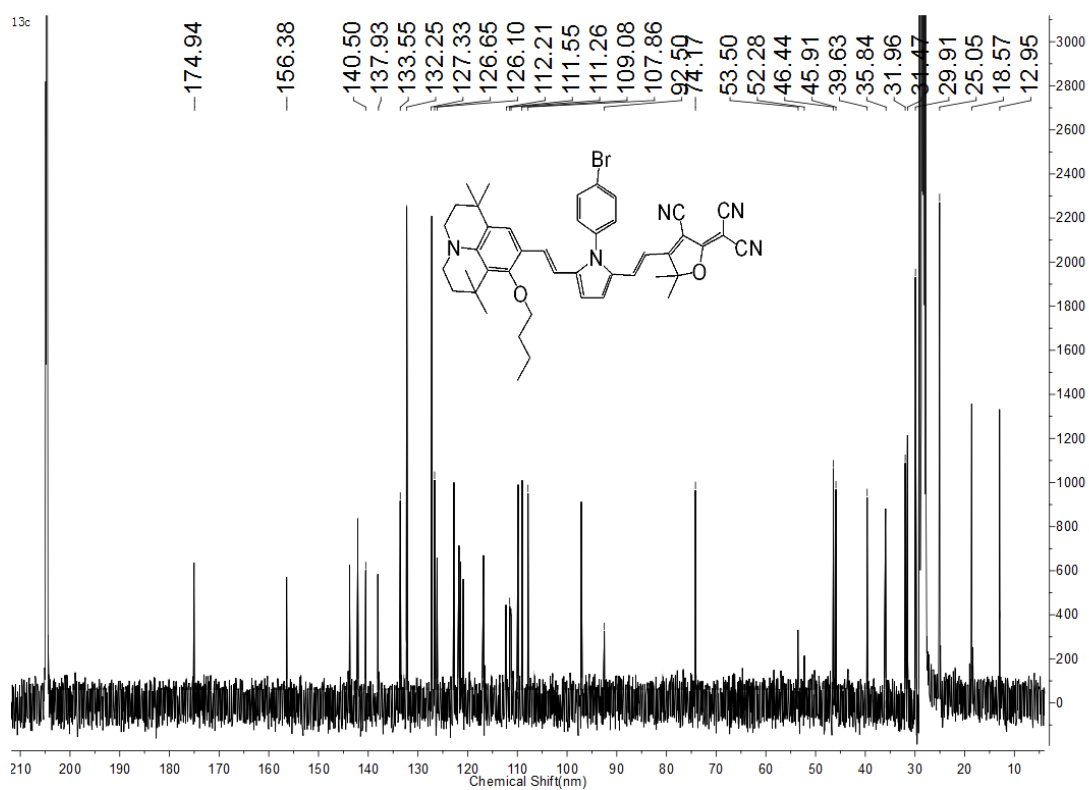

Chromophore B <sup>1</sup>H NMR spectra

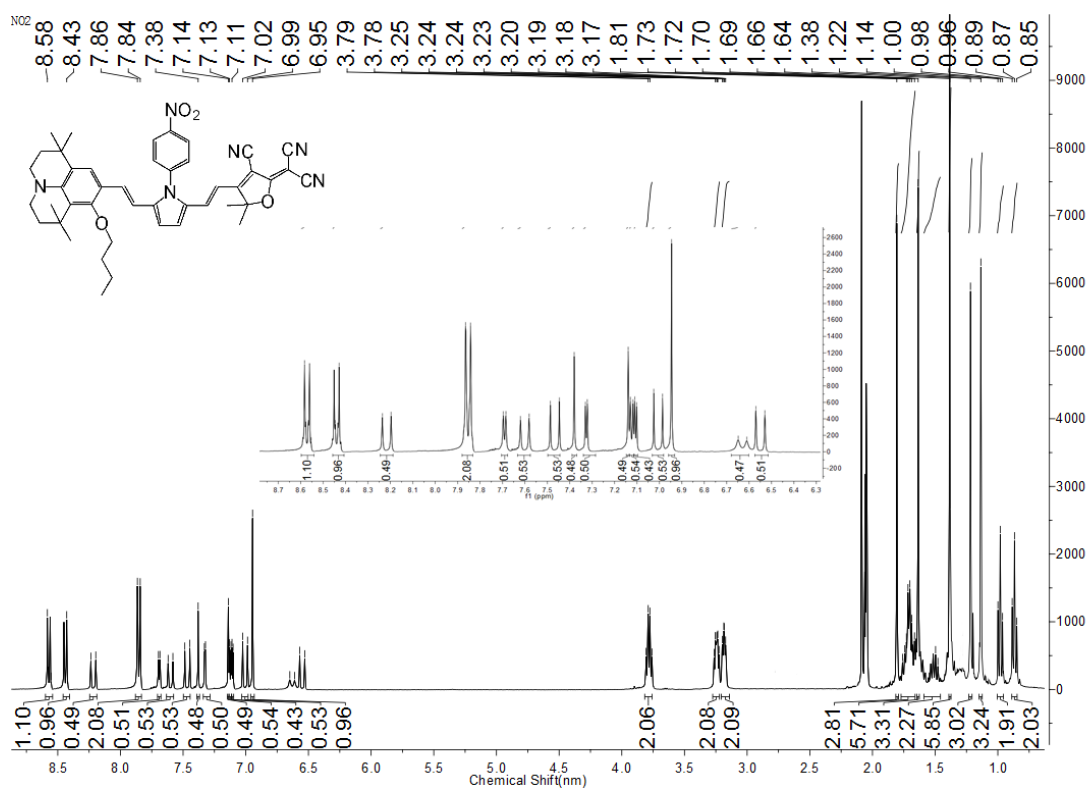

Chromophore B  $^{13}\text{C}$  NMR spectra

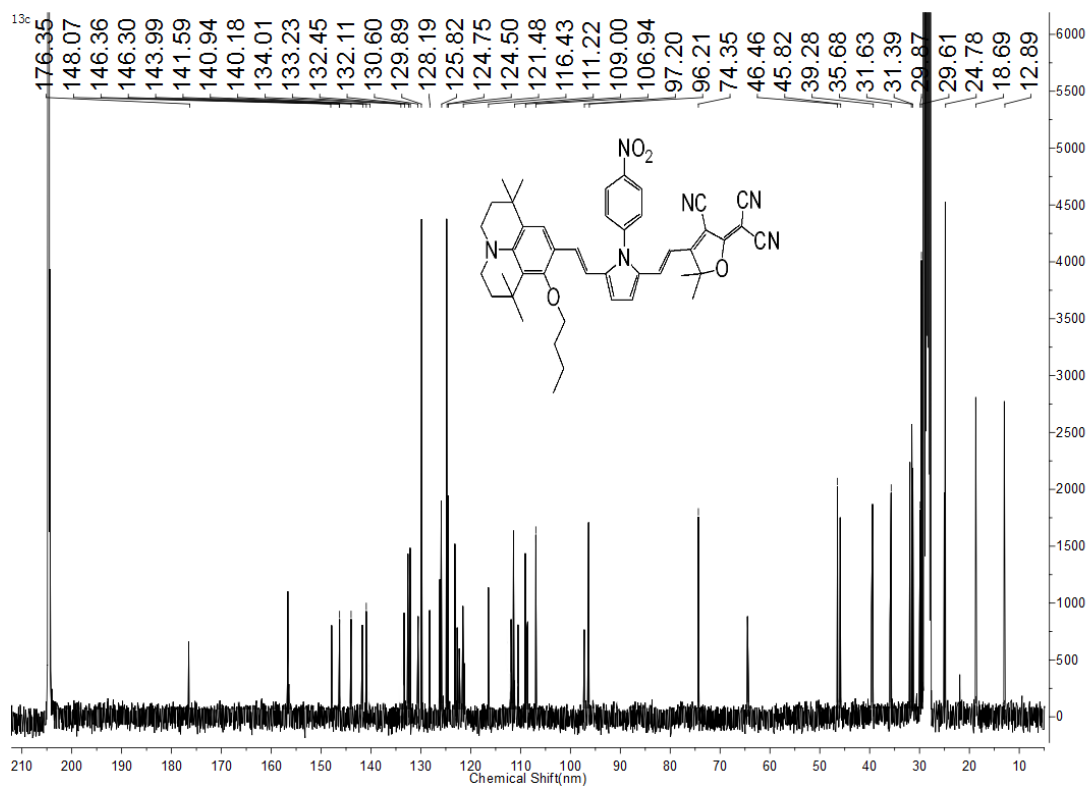

Chromophore C  $^1\text{H}$  NMR spectra

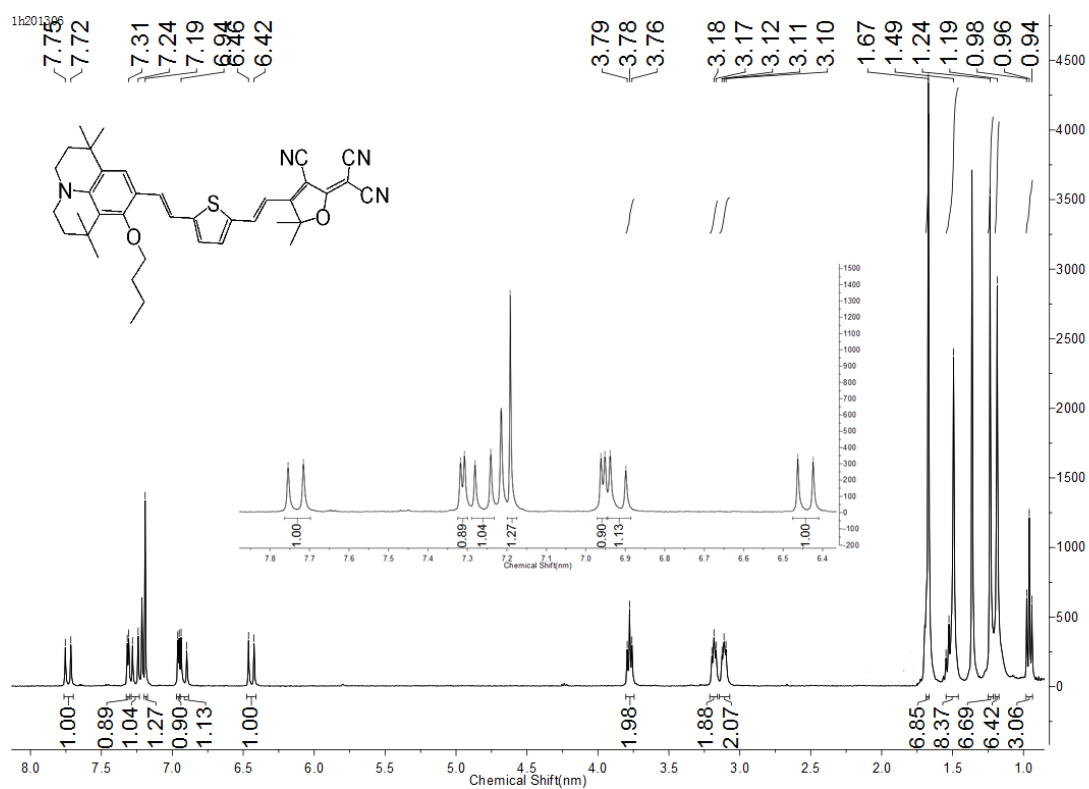

Chromophore C <sup>13</sup>C NMR spectra

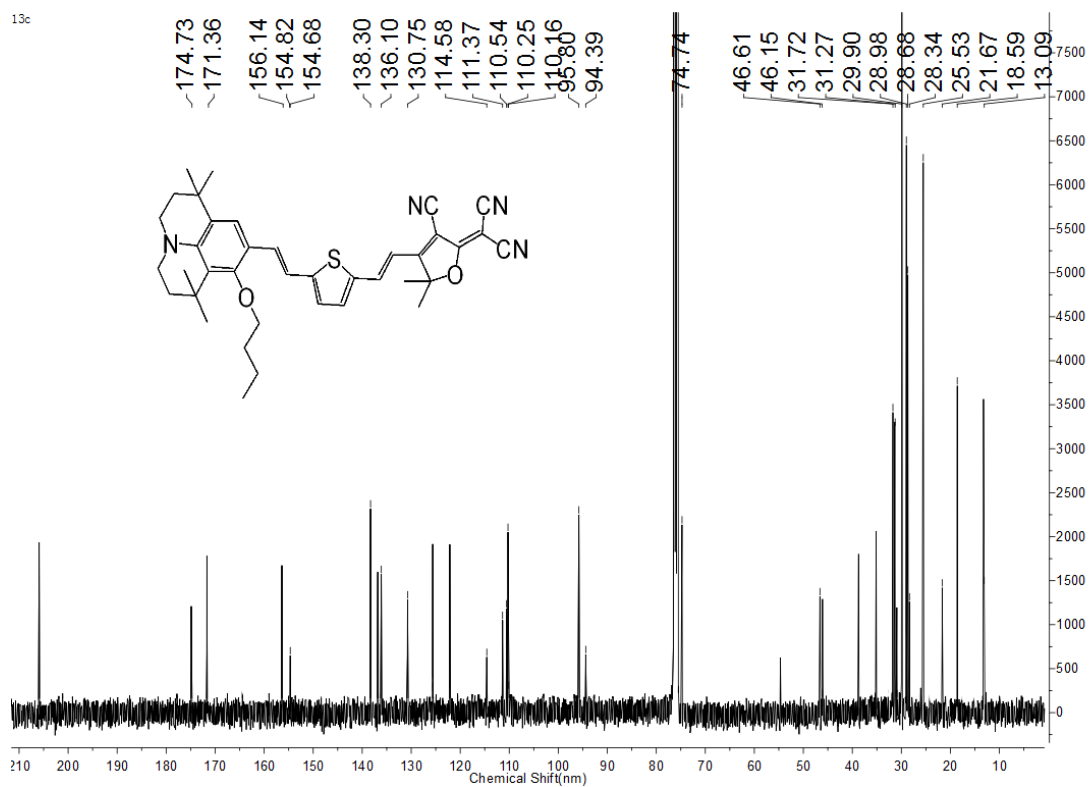

Supplement: c4tc00900b1.pdf [file c4tc00900b1.pdf]
